# Supplementary material for: Age, sex, and regional disparities in vision impairment burden among the population with diabetes: A 10-year trend analysis in Taiwan
Source: Research Square preprint supplement (doi:10.21203/rs.3.rs-6994966/v1), 2025-11-07
Supplement: Supplementary file 1 [file 1b924a29cdf0521ec7b24daf.pdf]

**Supplement 5. Comparison of the DR-related vision impairment estimates between our study and the Visual Loss Expert Group (VLEG) / Global Burden of Disease Study (GBD).**

**1. Comparison with region-level estimates**

| VLEG/GBD*    | Age-standardized population prevalence (‰), 2020 |           |         |           |
|--------------|--------------------------------------------------|-----------|---------|-----------|
|              | All age                                          |           | Age 50+ |           |
|              | MSVI                                             | Blindness | MSVI    | Blindness |
| High-income  | 0.168                                            | 0.075     | 0.665   | 0.254     |
| Asia Pacific |                                                  |           |         |           |
| East Asia    | 0.418                                            | 0.107     | 1.805   | 0.385     |
|              |                                                  |           |         |           |
| Our study    | Age 20+                                          |           | Age 55+ |           |
|              | MSVI                                             | Blindness | MSVI    | Blindness |
|              |                                                  |           |         |           |
| Taiwan       | 0.586                                            | 0.087     | 1.606   | 0.198     |

DR, diabetic retinopathy; VLEG, Vision Loss Expert Group; GBD, Global Burden of Disease Study; MSVI, moderate and severe vision impairment

\* Data was obtained from the VLEG/GBD 2020 model through Vision Atlas on the International Agency for the Prevention of Blindness (IAPB) website:

1. Bourne R, Steinmetz J, Flaxman S, et al., Trends in prevalence of blindness and distance and near vision impairment over 30 years: an analysis for the Global Burden of Disease Study. Lancet Glob Health. 2020. Accessed via the IAPB Vision Atlas (<https://www.iapb.org/learn/vision-atlas>)
2. Adelson, J., Bourne, R. R. A., Briant, P. S., Flaxman, S., Taylor, H., Jonas, J. B., et al., Causes of blindness and vision impairment in 2020 and trends over 30 years, and prevalence of avoidable blindness in relation to VISION 2020: the Right to Sight: an analysis for the Global Burden of Disease Study. Lancet Global Health. 2020. Accessed via the IAPB Vision Atlas (<https://www.iapb.org/learn/vision-atlas>)

## 2. Comparison with country-level estimates

Vision impairment caused by diabetic retinopathy in Taiwan, 2019

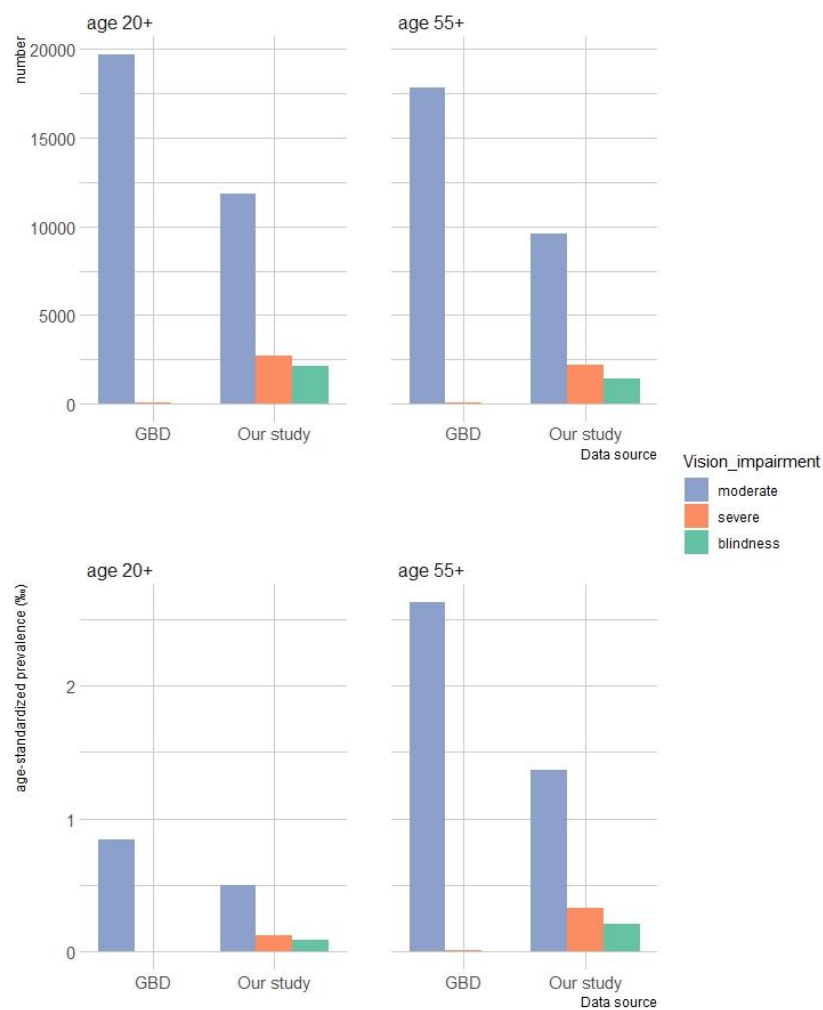

We obtained the age-specific number of DR-related vision impairment in Taiwan estimated by GBD 2021 from the GBD Results Tool:

Global Burden of Disease Collaborative Network.

Global Burden of Disease Study 2021 (GBD 2021) Results.

Seattle, United States: Institute for Health Metrics and Evaluation (IHME), 2022.

Available from <https://vizhub.healthdata.org/gbd-results/>.
