# Supplementary material for: Age, sex, and regional disparities in vision impairment burden among the population with diabetes: A 10-year trend analysis in Taiwan
Source: Research Square preprint supplement (doi:10.21203/rs.3.rs-6994966/v1), 2025-11-07
Supplement: Supplementary file 4 [file 7e23a2332753d9c5588bb20b.pdf]

**Supplement table 1. Diagnosis codes for major eye diseases and diabetes mellitus**

| <b>Eye disease</b>                                                                             | <b>Diagnosis codes</b>                                                                                                                                                                                                                                                                                                                                                              |
|------------------------------------------------------------------------------------------------|-------------------------------------------------------------------------------------------------------------------------------------------------------------------------------------------------------------------------------------------------------------------------------------------------------------------------------------------------------------------------------------|
| <b>AMD</b>                                                                                     | <u>ICD-9</u> : 362.50~2, 362.57<br><u>ICD-10</u> : H35.30, H35.31~2, H35.361~9,                                                                                                                                                                                                                                                                                                     |
| <b>MMD (diagnosis codes for myopic macular degeneration / atrophy, tractional maculopathy)</b> | <u>ICD-9</u> : 360.21, 361.10~9, 362.53~6, 363.30~5, 363.40~1, 367.1,<br><u>ICD-10</u> : H31.001~9, H31.091~9, H31.101~9, H31.111~9, H31.121~9, H33.101~9, H33.191~9, H35.341~9, H35.351~9, H35.371~9, H43.821~9, H44.20~3, H52.10~3                                                                                                                                                |
| <b>POAG</b>                                                                                    | <u>ICD-9</u> : 365.00~1, 365.10~5, 365.9, 377.14<br><u>ICD-10</u> : H40.001~9, H40.011~9, H40.021~9, H40.10X0~4, H40.11X0~4, H40.1210~3, H40.151~9, H47.231~9<br>(Exclude diagnosis codes of primary angle-closure glaucoma:<br><u>ICD-9</u> : 365.20~4<br><u>ICD-10</u> : H40.061~2, H40.20X0~4, H40.211~9, H40.2210~4, H40.2220~4, H40.2230~4, H40.2290~4, H40.231~9, H40.241~9 ) |
| <b>DM / DR</b>                                                                                 | <u>ICD-9</u> : 250.0~9<br><u>ICD-10</u> : E10, E11, E13<br>Although there are specific codes for diabetic retinopathy, we used the code for diabetes in conjunction with ophthalmic visits and fundus exams (23702c) to more broadly encompass diabetic patients who may have DR or other eye diseases.                                                                             |

AMD, age-related macular degeneration; MMD, myopic macular degeneration; POAG, primary open angle glaucoma; DM, diabetes mellitus; DR, diabetic retinopathy
