# Supplementary material for: Age, sex, and regional disparities in vision impairment burden among the population with diabetes: A 10-year trend analysis in Taiwan
Source: Research Square preprint supplement (doi:10.21203/rs.3.rs-6994966/v1), 2025-11-07
Supplement: Supplementary file 5 [file 7ee88c05a06a9beaf5e2d0ba.pdf]

### Supplement 3. The framework of the hierarchical Bayesian conjugate Dirichlet-multinomial model for the estimation of levels of vision impairment

$\vec{Y}$ : estimated number of vision impairment of different severity: no, mild moderate, sever and blindness (vector of 5)

$N$ : Population number of specific gender, age group and hospital level, derived from National Health Insurance Research Database (NHIRD)

Three levels of hierarchical structure: gender, age group, hospital level

$$\vec{Y}_{ijk} \sim \text{Multinomial}(N_{ijk}, \vec{p}_{ijk})$$

$i=1,2$  (gender: male, female)

$j=1,2,3,4$  (age group: age 20-39, age 40-54, age 55-69, age  $\geq 70$ )

$k=1,2,3$  (hospital level: medical center, regional hospital, local hospital/clinic)

$$\vec{\theta}_i \sim \text{Dirichlet}(\vec{\alpha}_{all})$$

$$\vec{\alpha}_{all} = \vec{\theta}_{all} * \omega_s$$

$\vec{\theta}_{all}$ : overall proportion (overall expectation value)

$\omega_s$ : strength between sex level

$$\vec{\theta}_{ij} \sim \text{Dirichlet}(\vec{\alpha}_i)$$

$$\vec{\alpha}_i = \vec{\theta}_i * \omega_A$$

$\vec{\theta}_i$ : proportion in each sex level

$\omega_A$ : strength among age\_group level

$$\vec{p}_{ijk} \sim \text{Dirichlet}(\vec{\alpha}_{ij})$$

$$\vec{\alpha}_{ij} = \vec{\theta}_{ij} * \omega_L$$

$\vec{\theta}_{ij}$ : proportion in each age\_group level

$\omega_L$ : strength among hospital\_level level

$$\omega_s \sim \text{gamma}(0.01, 0.01)$$

$$\omega_A \sim \text{gamma}(0.01, 0.01)$$

$$\omega_L \sim \text{gamma}(0.01, 0.01)$$
