# Supplementary material for: Age, sex, and regional disparities in vision impairment burden among the population with diabetes: A 10-year trend analysis in Taiwan
Source: Research Square preprint supplement (doi:10.21203/rs.3.rs-6994966/v1), 2025-11-07

**Supplemental Figure 1. Number and proportion of year lived with disability (YLD) due to vision impairment from different causes in 2019, stratified by age group.**

DR, diabetic retinopathy; POAG, primary open angle glaucoma; AMD, age-related macular degeneration; MMD, myopic macular degeneration.

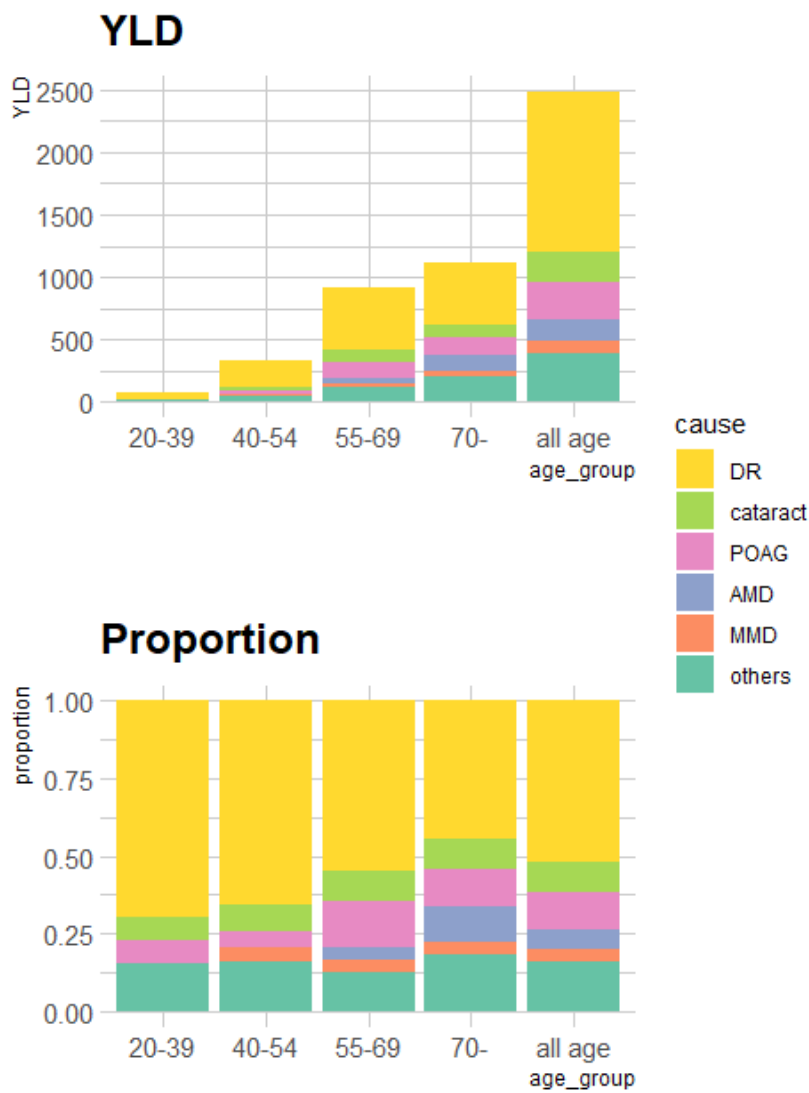

Supplement: Supplementary file 7 [file e69577dc6431dd4a9b03edb4.pdf]
